# Supplementary material for: Sulforaphane reduces intracellular survival of Staphylococcus aureus in macrophages through inhibition of JNK and p38 MAPK-induced inflammation
Source: PubMed Central journal article supplement — Int J Mol Med. 2020 Apr 1;45(6):1927–41. doi: 10.3892/ijmm.2020.4563 (PMC7169961; doi:10.3892/ijmm.2020.4563), 2020-04-01

Figure S1. Oxidative stress is unaffected by SFN treatment or *S. aureus* infection. THP-1-derived macrophages were pretreated with 10  $\mu$ M SFN for 3 h and then infected with *S. aureus*. Cells were incubated for 24 h prior to visualization of reactive oxygen species production using a CellRox assay. Confocal images are representative of n=3 independent experiments. Scale bar, 50  $\mu$ m. SFN, sulforaphane; *S. aureus*, *Staphylococcus aureus*; DMSO, dimethyl sulfoxide.

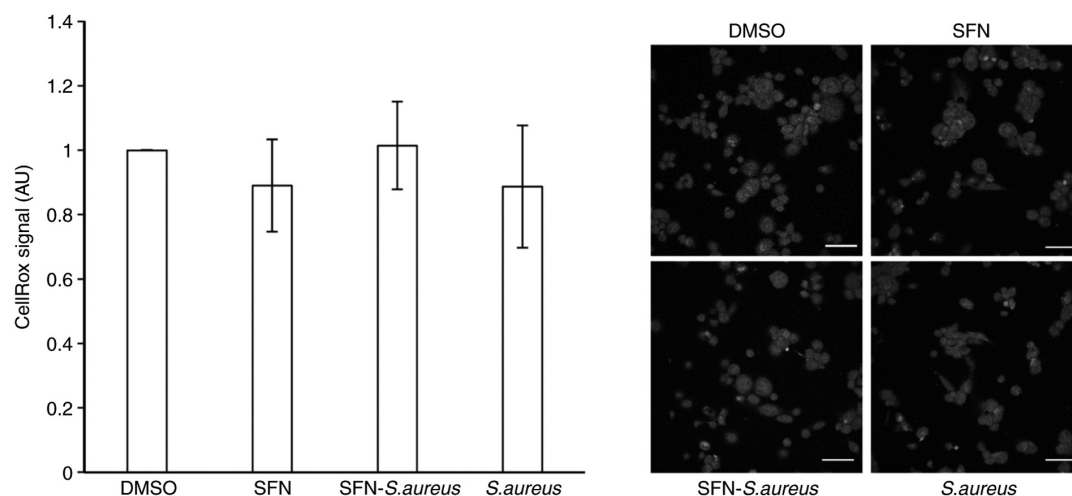

Supplement: Supplementary_Data.pdf [file Supplementary_Data.pdf]
